# Supplementary material for: Viral detection using DNA functionalized gold filaments
Source: Royal Society of Chemistry journal article supplement (doi:10.1039/b904191e), 2009-01-01
Supplement: b904191e.pdf [file b904191e.pdf]

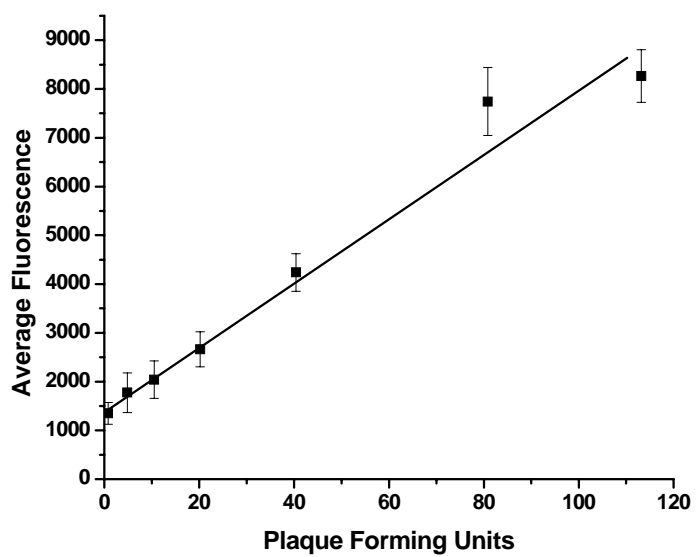

**Figure S1.** Standard curve showing the linear range of the filament-based assay. A linear range up to 115 PFU can be calculated with an  $R^2$  of 0.9717.
